# Supplementary material
Source: PubMed Central journal article supplement (PMC1458985)
Supplement: pnas_0601944103_1.pdf [file pnas_0601944103_1.pdf]

## Supporting Methods

### **Sample Preparation of M2 TM Domain Vesicles for Use in Bilayer and Multilayer**

**Conductance Studies.** Lipid vesicles were prepared by mixing phosphatidylethanolamine, phosphatidylserine, phosphatidylcholine, and cholesterol (Avanti Polar Lipids) at a molar ratio of 4:1:1:2 (total mass of 10 mg) with or without 0.05 mg of M2 TM domain in chloroform, drying to a thin layer under N<sub>2</sub>, vortexing together with 1 ml of saline solution (150 mM KH<sub>2</sub>PO<sub>4</sub>), and sonicating four times for 1 min each at 2-min intervals. The vesicles were stored at 4°C for no longer than 1 week.

For uptake measurements, a 30- $\mu$ l aliquot of freshly vortexed vesicle suspension was added to 3 ml of saline solution (0.2 mM tricine/200 mM Na<sub>2</sub>SO<sub>4</sub>) and stirred for 5 min at room temperature (25°C). A sensitive and selective pH electrode probe (Accu pHast) was used to detect the changes, which typically range over a few hundredths of a pH unit, small enough to be linear on a logarithmic scale. The ratio of [K<sup>+</sup>] between the inside and outside of the vesicles ( $\approx$ 100 after vesicle injection) was designed to produce a membrane potential, after activity corrections, of  $-103$  mV for a perfectly K<sup>+</sup> selective membrane, whereas the pH gradient was negligible. After the pH had stabilized near pH 6.9, a baseline was recorded for 2 min. Three microliters of valinomycin (25 mg/ml in ethanol) was then added while stirring. Three minutes later, 7.5  $\mu$ l of carbonyl cyanide *m*-chlorophenylhydrazone (200 mM in ethanol) was added while stirring. Independent experiments with ethanol with and without liposomes show that the ethanol causes a slight shift in pH, apparently due to the high pK<sub>a</sub> of ethanol relative to water. After about 5 min, two back titrations were performed with 30  $\mu$ l of HCl (1 mM) at 2-min intervals to provide a calibration for the titration of  $\approx$ 3 ml of extravesicular buffer volume with 30 neq H<sup>+</sup>.

**Deconvolution Analysis of the NMR Data.** For the overlapped <sup>15</sup>N chemical shifts that are substantially overlapped, signal deconvolution is necessary to extract the signal intensities. To deconvolute these overlapping resonances, three parameters were defined: peak position, peak height, and peak half-height linewidth. The chemical shift positions were fixed, because they do not vary significantly as a function of pH and the linewidth

for each resonance varies only slightly through the titration. For each simulated spectrum using a narrow range of linewidths and peak heights, a difference spectrum was calculated with the experimental spectrum and judged by standard deviation with the noise level from the experimental spectrum. Only those simulations generating difference spectra with a standard deviation <150% that of the noise level were included in the data analysis of the proportion of charged and uncharged histidine residues.

**Modeling of Multistep Proton Dissociation of the M2 TM Domain.** We propose that the M2 proton channel can release protons in a fractional style (Scheme 1).

**Scheme 1**

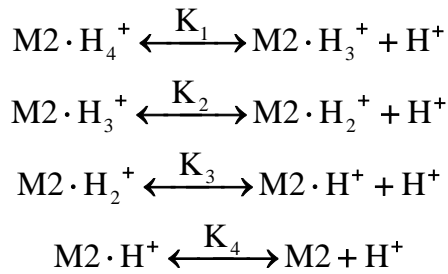

Thus, each equilibrium constant can be written as:

$$\text{K}_1 = \frac{[\text{M2} \cdot \text{H}_3^+][\text{H}^+]}{[\text{M2} \cdot \text{H}_4^+]} \quad [1]$$

$$\text{K}_2 = \frac{[\text{M2} \cdot \text{H}_2^+][\text{H}^+]}{[\text{M2} \cdot \text{H}_3^+]} \quad [2]$$

$$\text{K}_3 = \frac{[\text{M2} \cdot \text{H}^+][\text{H}^+]}{[\text{M2} \cdot \text{H}_2^+]} \quad [3]$$

$$K_4 = \frac{[M2][H^+]}{[M2 \cdot H^+]} \quad [4]$$

Here, for simplicity, we use the concentration of different species instead of activities. Other useful equations (Eqs. 5–7), shown below, can be derived from Eqs. 1–4:

$$K_1 K_2 = \frac{[M2 \cdot H_2^+][H^+]^2}{[M2 \cdot H_4^+]} \quad [5]$$

$$K_1 K_2 K_3 = \frac{[M2 \cdot H^+][H^+]^3}{[M2 \cdot H_4^+]} \quad [6]$$

$$K_1 K_2 K_3 K_4 = \frac{[M2][H^+]^4}{[M2 \cdot H_4^+]} \quad [7]$$

The  $^{15}\text{N}$  cross-polarization magic-angle spinning spectra cannot differentiate between the various  $M2 \cdot H_{1-4}^+$  tetramers. However, the concentration ratio of neutral histidine [His] and charged histidine [ $\text{HisH}^+$ ] can be obtained from the NMR spectra and expressed as a function of pH from the combination of Eqs. 1–7.

$$\begin{aligned} \frac{[\text{His}]}{[\text{HisH}^+]} &= \frac{[M2 \cdot H_3^+] + 2[M2 \cdot H_2^+] + 3[M2 \cdot H^+] + 4[M2]}{4[M2 \cdot H_4^+] + 3[M2 \cdot H_3^+] + 2[M2 \cdot H_2^+] + [M2 \cdot H^+]} \\ &= \frac{\frac{[M2 \cdot H_3^+]}{[M2 \cdot H_4^+]} + 2 \frac{[M2 \cdot H_2^+]}{[M2 \cdot H_4^+]} + 3 \frac{[M2 \cdot H^+]}{[M2 \cdot H_4^+]} + 4 \frac{[M2]}{[M2 \cdot H_4^+]}}{4 + 3 \frac{[M2 \cdot H_3^+]}{[M2 \cdot H_4^+]} + 2 \frac{[M2 \cdot H_2^+]}{[M2 \cdot H_4^+]} + \frac{[M2 \cdot H^+]}{[M2 \cdot H_4^+]}} \\ &= \frac{\frac{K_1}{10^{-\text{pH}}} + 2 \frac{K_1 K_2}{10^{-2\text{pH}}} + 3 \frac{K_1 K_2 K_3}{10^{-3\text{pH}}} + 4 \frac{K_1 K_2 K_3 K_4}{10^{-4\text{pH}}}}{4 + 3 \frac{K_1}{10^{-\text{pH}}} + 2 \frac{K_1 K_2}{10^{-2\text{pH}}} + \frac{K_1 K_2 K_3}{10^{-3\text{pH}}}} \quad [8] \end{aligned}$$

The number of protons ( $N_{\text{proton}}$ ) released from a four-charged histidine complex is related to the concentration ratio of neutral histidine [His] and charged histidine [ $\text{HisH}^+$ ],

$$N_{\text{proton}} = \frac{4}{1 + \frac{[\text{HisH}^+]}{[\text{His}]}} . \quad [9]$$

Therefore,  $N_{\text{proton}}$  as a function of  $K_1$ ,  $K_2$ ,  $K_3$ , and  $K_4$  is

$$N_{\text{proton}} = \frac{4}{1 + \frac{4 + 3\frac{K_1}{10^{-\text{pH}}} + 2\frac{K_1K_2}{10^{-2\text{pH}}} + \frac{K_1K_2K_3}{10^{-3\text{pH}}}}{\frac{K_1}{10^{-\text{pH}}} + 2\frac{K_1K_2}{10^{-2\text{pH}}} + 3\frac{K_1K_2K_3}{10^{-3\text{pH}}} + 4\frac{K_1K_2K_3K_4}{10^{-4\text{pH}}}}} . \quad [10]$$

The proton dissociation constants  $K_1$ ,  $K_2$ ,  $K_3$ , and  $K_4$  were obtained by fitting the curve of  $N_{\text{proton}}$  vs. pH by using ORIGIN 5.0 software (Microcal, Amherst, MA).
